# Supplementary material for: Sensitisation of cancer cells to radiotherapy by serine and glycine starvation
Source: PubMed Central journal article supplement (PMC9643498; doi:10.1038/s41416-022-01965-6), 2022-09-17
Supplement: 41416_2022_1965_MOESM1_ESM.pdf [file 41416_2022_1965_MOESM1_ESM.pdf]

Falcone et. al.,  
Supplementary Information

# Figure S1

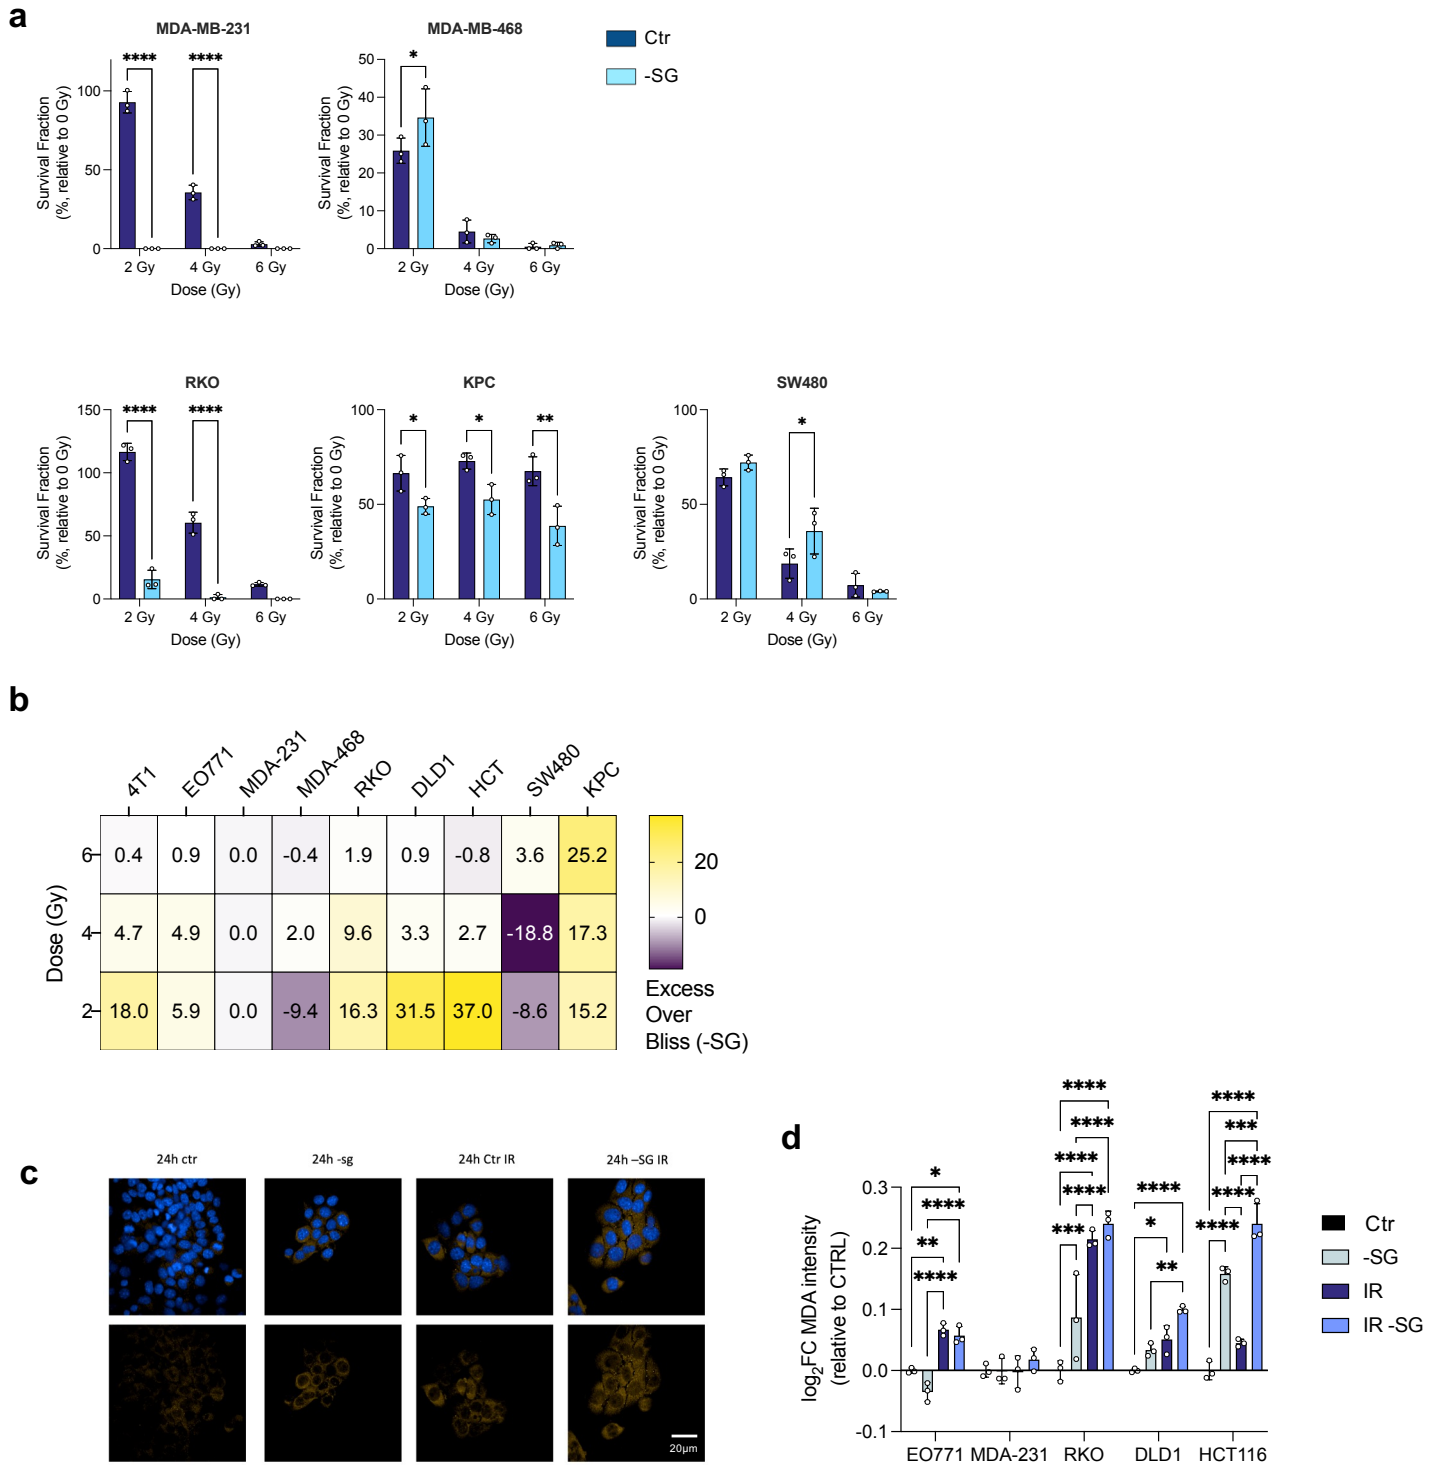

**Figure S1. Serine and glycine starvation sensitises a range of cancer cells to radiation *in vitro* (linked to Figure 1)**

- a) Quantification of clonogenic assays for the displayed cell lines cultured with media containing serine and glycine (+SG) or not (-SG) and irradiated with increasing dose of radiation (0-6 Gy); surviving fraction relative to non-irradiated controls (mean  $\pm$  SD, one experiment in biological triplicate, Two-way ANOVA with Šidák's multiple comparisons test, \* $p < 0.05$ , \*\* $p < 0.005$ , \*\*\* $p < 0.0005$ , \*\*\*\* $p < 0.00005$ ). For MDA-MB-231 cells there was complete cell death in the -SG condition for all doses of radiation.
- b) Excess over Bliss score based on clonogenic assays of displayed lines cultured with media containing serine and glycine or not and irradiated with increasing dose of radiation (0-6 Gy) (mean,  $n = 4$  experiments in biological triplicate for 4T1 and one experiment in biological triplicate for other cell lines).
- c) Representative images of malondialdehyde (MDA) adduct detected using immunofluorescence staining 24h after treatment. 4T1 cells were cultured with media containing serine and glycine (Ctr) or not (-SG) and irradiated with a final dose of 4Gy X-ray radiation (IR) (scale bar 20 $\mu$ m).
- d) Quantification of malondialdehyde (MDA) adduct intensity relative to Ctr measured using immunofluorescence staining 72h after treatment. Cells were cultured with media containing serine and glycine (+SG) or not (-SG) and irradiated with a final dose of radiations of 4Gy (IR). (mean  $\pm$  SD, one experiment in biological triplicate, Two-way ANOVA with Tukey's multiple comparisons test, \* $p < 0.05$ , \*\* $p < 0.005$ , \*\*\* $p < 0.0005$ , \*\*\*\* $p < 0.00005$ ).



Figure S3

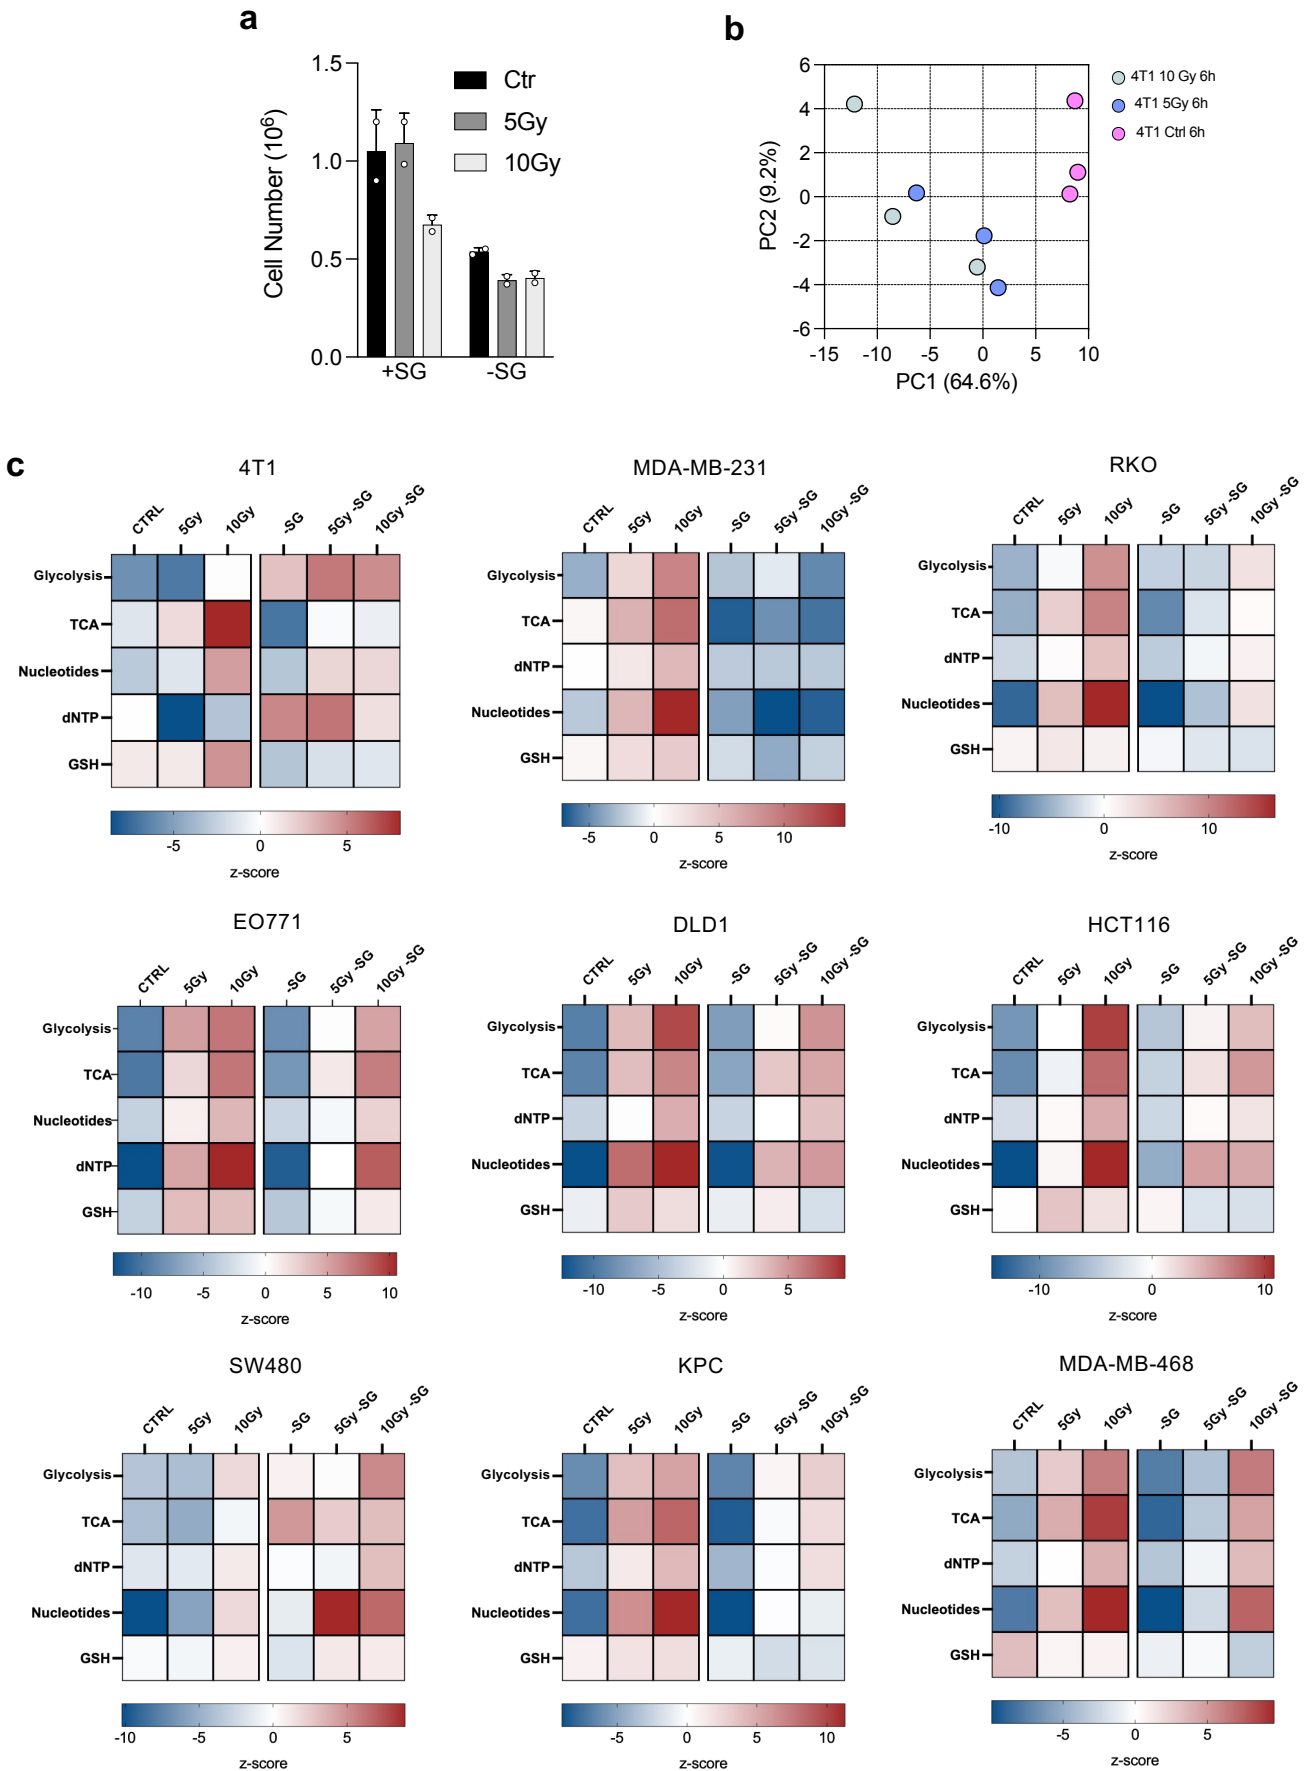

**Figure S3. Metabolomic impact of radiation and SG starvation (linked to Figure 2)**

- Absolute number of 4T1 cells used for metabolomics experiment (shown in Figure 3) cultured with media containing serine and glycine (Ctrl) or not (-SG) and irradiated with increasing doses of X-ray radiation (0, 5 and 10 Gy) for 24h (mean +/-SD, counts done in a single experiment in biological duplicate).
- Spatial division displayed as PCA plot based on the metabolomic profile of 4T1 cells cultured in complete medium irradiated with increasing dose of X-ray radiation (0/Ctrl, 5 and 10 Gy) and harvested at 6h post-radiation (one experiment in biological triplicate).
- Summarized pathway activity for the displayed cell lines cultured with media containing serine and glycine (CTRL) or not (-SG) and irradiated with increasing dose of radiations (0, 5 and 10 Gy) for 24h (one experiment in biological triplicate for each cell line).

Figure S4

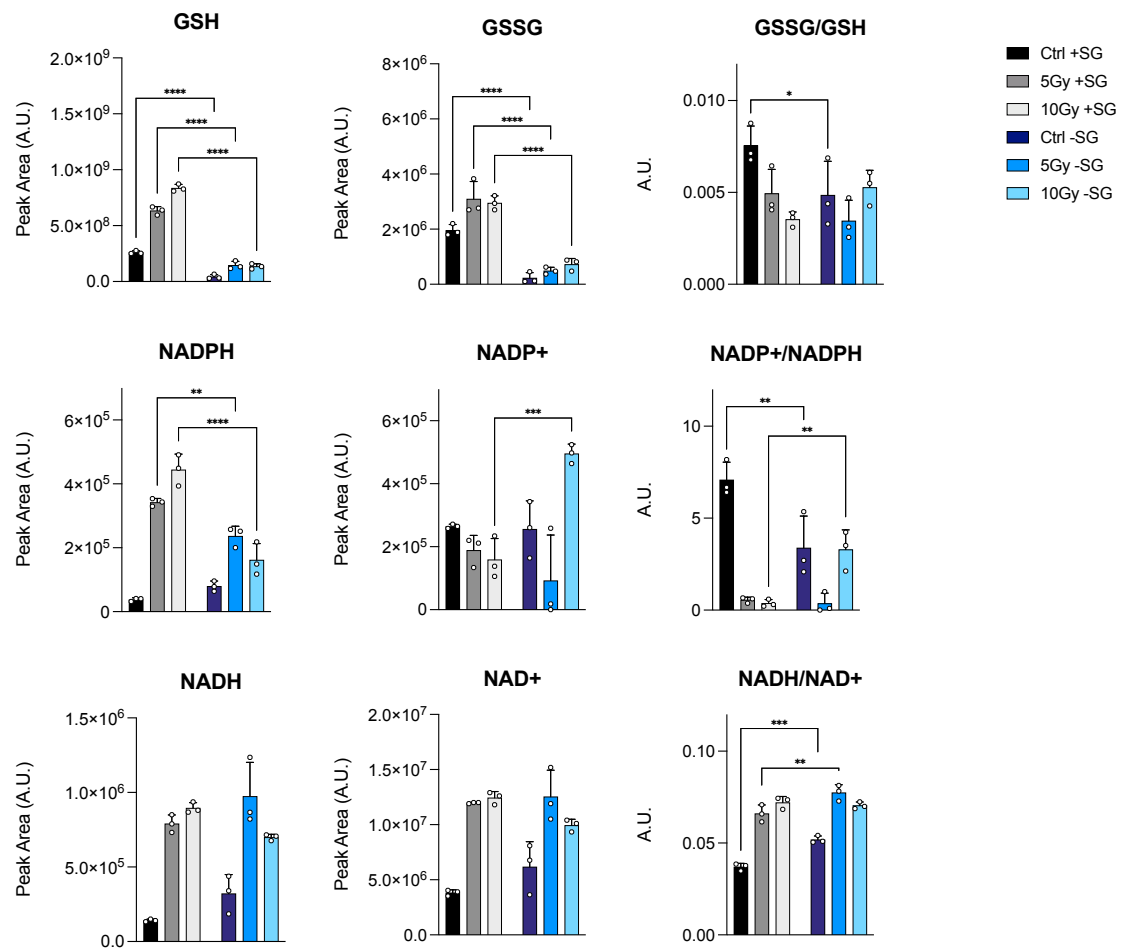

**Figure S4. Impact of radiotherapy on redox related metabolites (linked to Figure 3)**

Metabolite levels analysed by LCMS in 4T1 cells cultured with media containing serine and glycine (+SG) or not (-SG) and irradiated with increasing doses of X-ray radiation (0, 5 and 10 Gy) for 24h (mean +/-SD, one experiment in biological triplicate, Two-way ANOVA with Šidák's multiple comparisons test, \* $p < 0.05$ , \*\* $p < 0.005$ , \*\*\* $p < 0.0005$ , \*\*\*\* $p < 0.00005$ ).

Figure S5

**a**

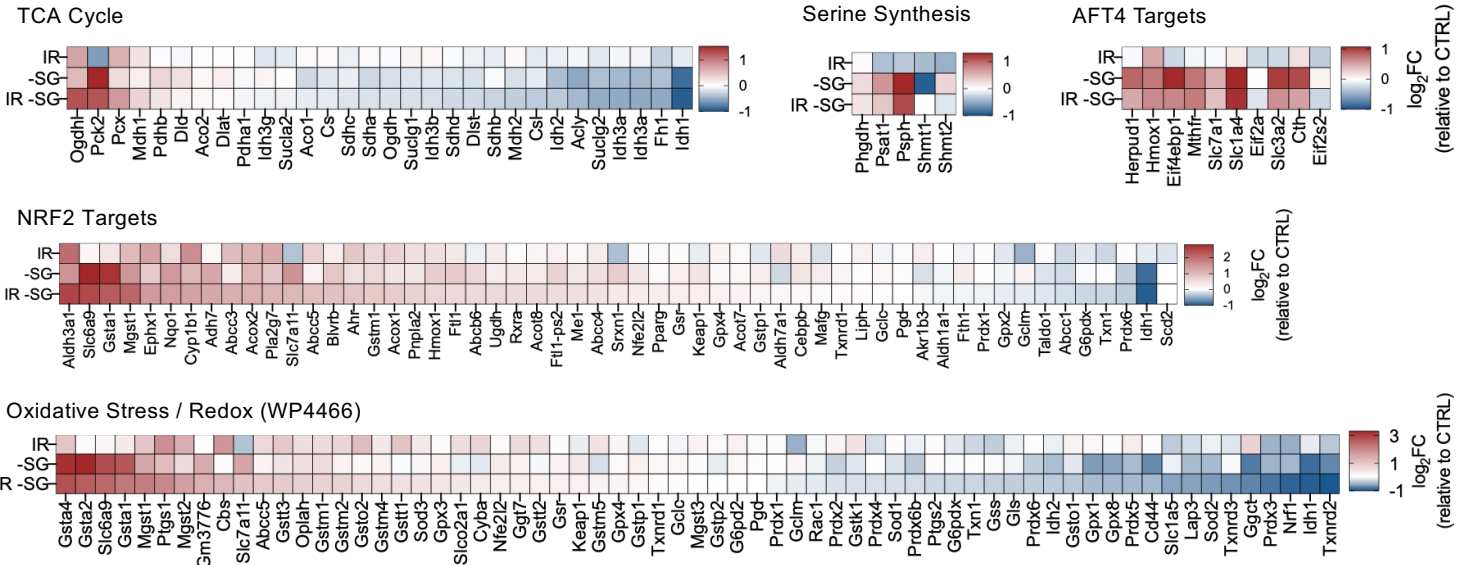

**b**

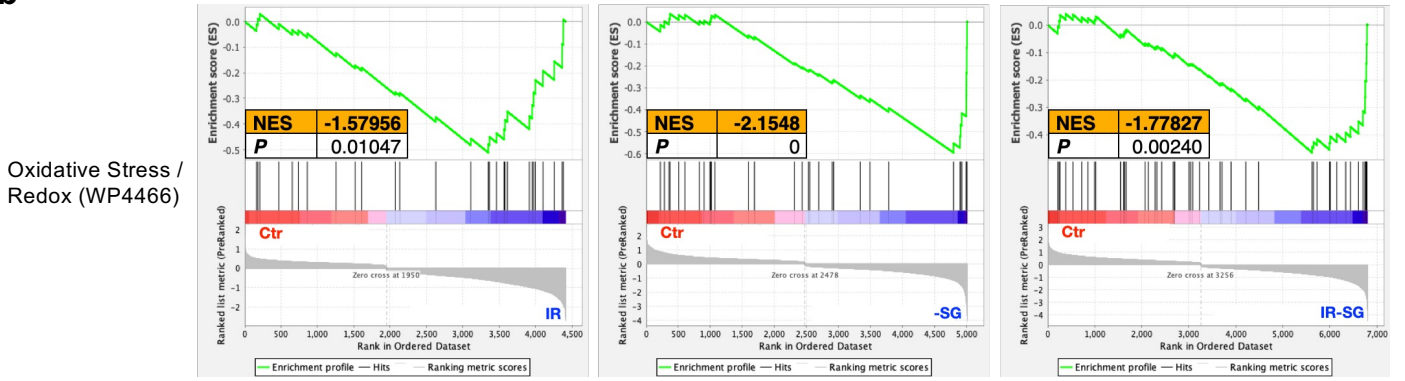

**c**

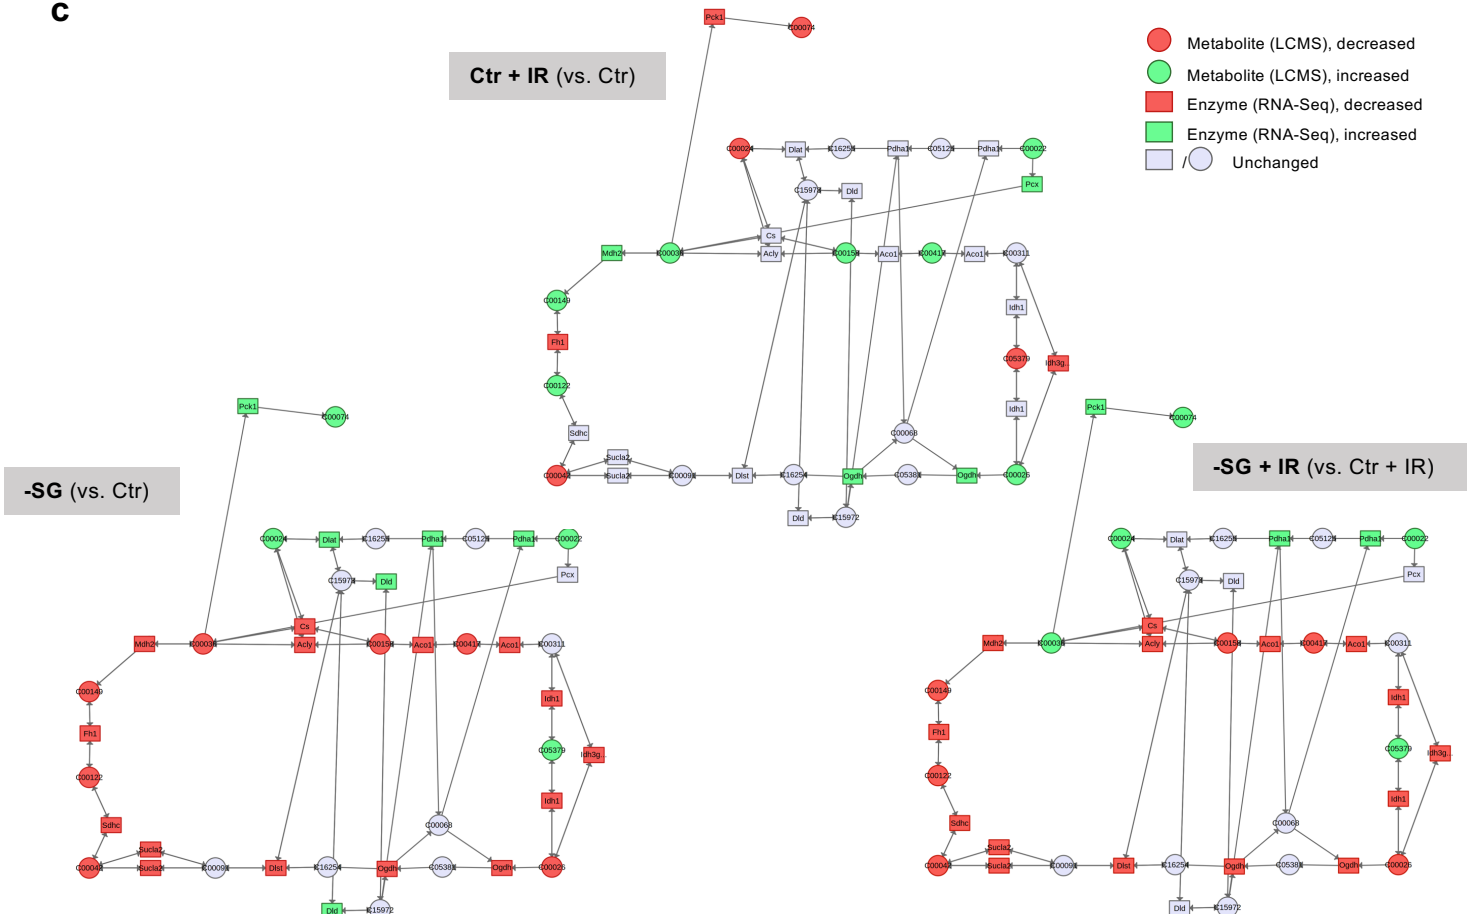

## Figure S5

### Figure S5. TCA cycle and stress responses impact of radiation and SG starvation (linked to Figure 4)

- a) Heat map representation of gene expression (as  $\log_2FC$  relative to Ctr condition) of members of the displayed pathways based on RNA-Seq profile of 4T1 cells cultured with media containing either serine and glycine (+SG) or not (-SG) and subsequently irradiated with a final dose of radiations 5 Gy (IR) for 24h.
- b) GSEA of the IR, -SG, IR-SG vs Ctr respectively using the WP4466 (Oxidative stress / Redox) gene sets (NES, normalized enrichment score).
- c) TCA cycle KEGG pathway overview displaying both enzyme (rectangles) and metabolite (circles) ratios between the highlighted conditions (one experiment in biological triplicate for both metabolomics profiling and RNA-Sequencing).

Figure S6

**a**

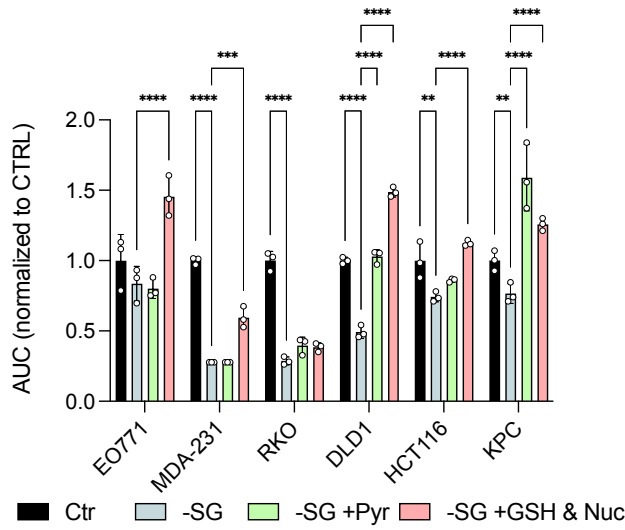

**b**

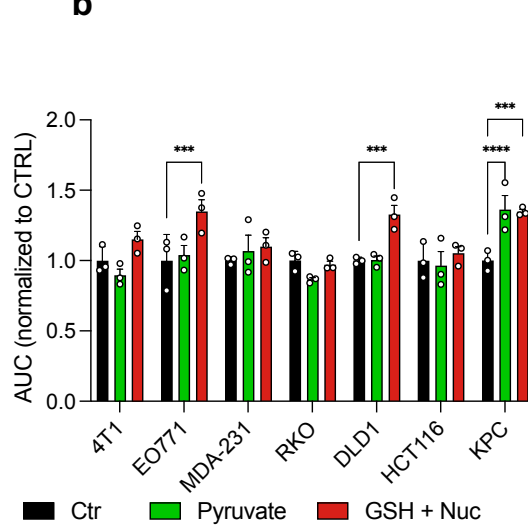

**c**

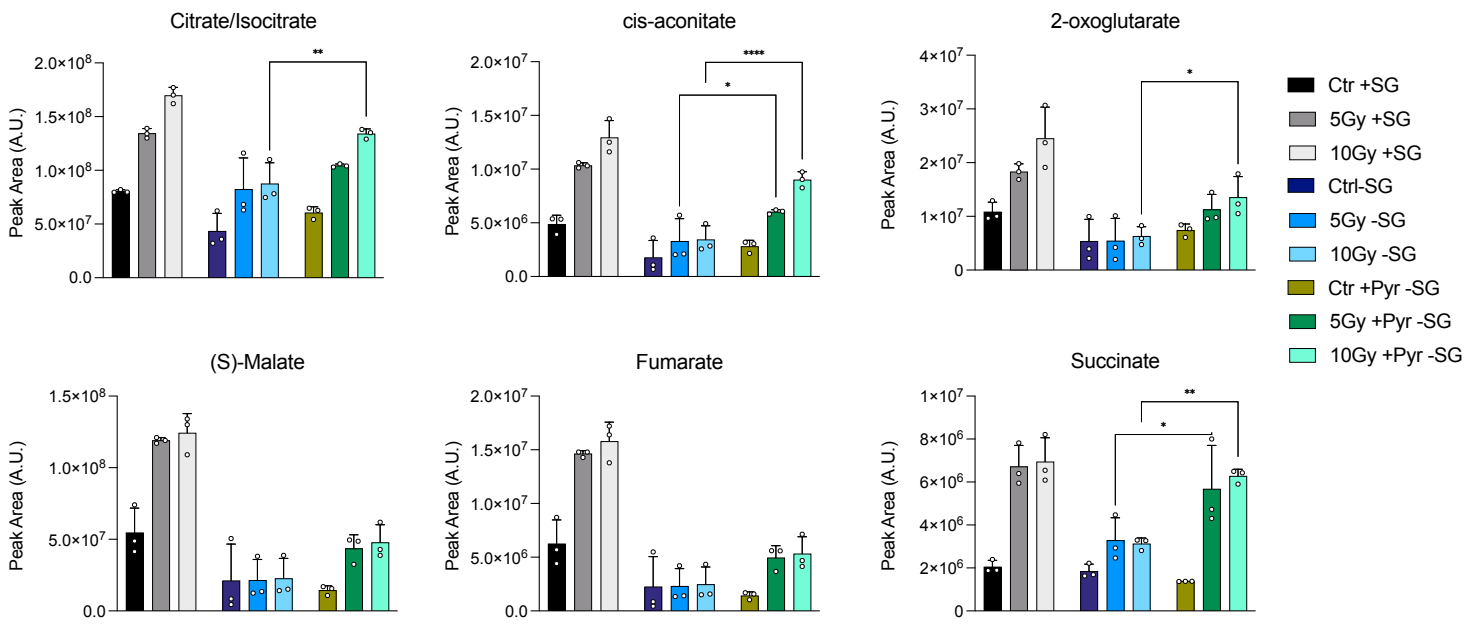

**d**

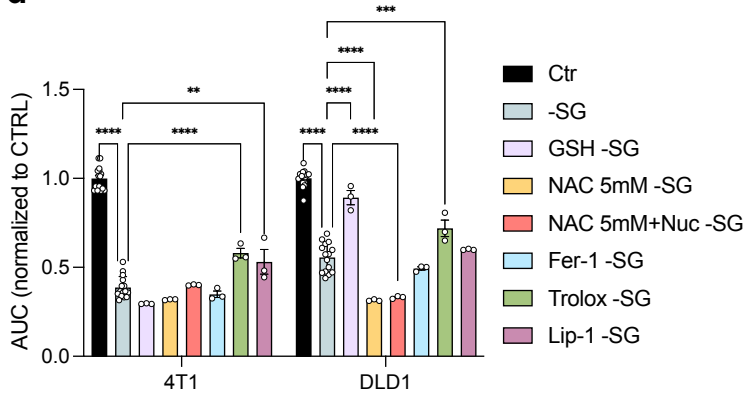

**e**

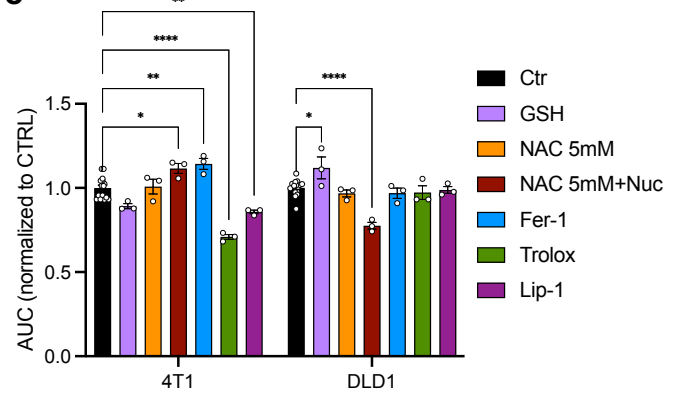



## Figure S6

### Figure S6. Metabolite rescue (linked to Figure 4)

- a) Clonogenic assay shown as normalized area under the curve (AUC) of the displayed cells lines cultured with media containing serine and glycine (Ctr) or not (-SG), irradiated with increasing dose of X-ray radiation (0-6 Gy) and with or without supplementation with 2mM Pyruvate or 2.5mM reduced glutathione & nucleosides mix (mean +/-SD, one experiment in biological triplicate, Two-way ANOVA with Dunnet's multiple comparisons test, \* $p < 0.05$ , \*\* $p < 0.005$ , \*\*\* $p < 0.0005$ , \*\*\*\* $p < 0.00005$ ).
- b) Clonogenic assay shown as normalized area under the curve (AUC) of the displayed cells lines cultured with media containing serine and glycine, irradiated with increasing dose of radiations (0-6 Gy) and supplemented with either 2mM Pyruvate or with 2.5mM reduced glutathione & nucleosides mix (mean +/-SD, one experiment in biological triplicate, Two-way ANOVA with Dunnet's multiple comparisons test, \* $p < 0.05$ , \*\* $p < 0.005$ , \*\*\* $p < 0.0005$ , \*\*\*\* $p < 0.00005$ ).
- c) Metabolite levels analysed by LCMS in 4T1 cells cultured with media containing serine and glycine (Ctr) or not (-SG) and with or without 2mM Pyruvate, subsequently irradiated with increasing doses of X-ray radiation (0, 5 and 10 Gy) for 24h (mean +/-SD, one experiment in biological triplicate Two-way ANOVA with Tukey's multiple comparisons test, \* $p < 0.05$ , \*\* $p < 0.005$ , \*\*\* $p < 0.0005$ , \*\*\*\* $p < 0.00005$ ).
- d) Clonogenic assay shown as normalized area under the curve (AUC) of 4T1 and DLD1 lines cultured with media containing serine and glycine (Ctr) or not (-SG), subsequently irradiated with increasing dose of radiations (0-6 Gy) and supplemented with 2.5mM reduced glutathione (GSH), 5mM N-acetylcysteine (NAC), 5mM NAC+nucleosides mix (NAC+Nuc), 2uM Ferrostatin-1 (Fer-1), 50uM Trolox or 100nM Liproxstatin-1 (Lip-1) (mean +/-SD, one experiment in biological triplicate, Two-way ANOVA with Dunnet's multiple comparisons test, \* $p < 0.05$ , \*\* $p < 0.005$ , \*\*\* $p < 0.0005$ , \*\*\*\* $p < 0.00005$ ).
- e) Clonogenic assay shown as normalized area under the curve (AUC) of 4T1 and DLD1 lines cultured with media containing serine and glycine, subsequently irradiated with increasing dose of radiations (0-6 Gy) and supplemented with 2.5mM reduced glutathione (GSH), 5mM N-acetylcysteine (NAC), 5mM NAC+nucleosides mix (NAC+Nuc), 2uM Ferrostatin-1 (Fer-1), 50uM Trolox or 100nM Liproxstatin-1 (Lip-1) (mean +/-SD, one experiment in biological triplicate, Two-way ANOVA with Dunnet's multiple comparisons test, \* $p < 0.05$ , \*\* $p < 0.005$ , \*\*\* $p < 0.0005$ , \*\*\*\* $p < 0.00005$ ).

Figure S7

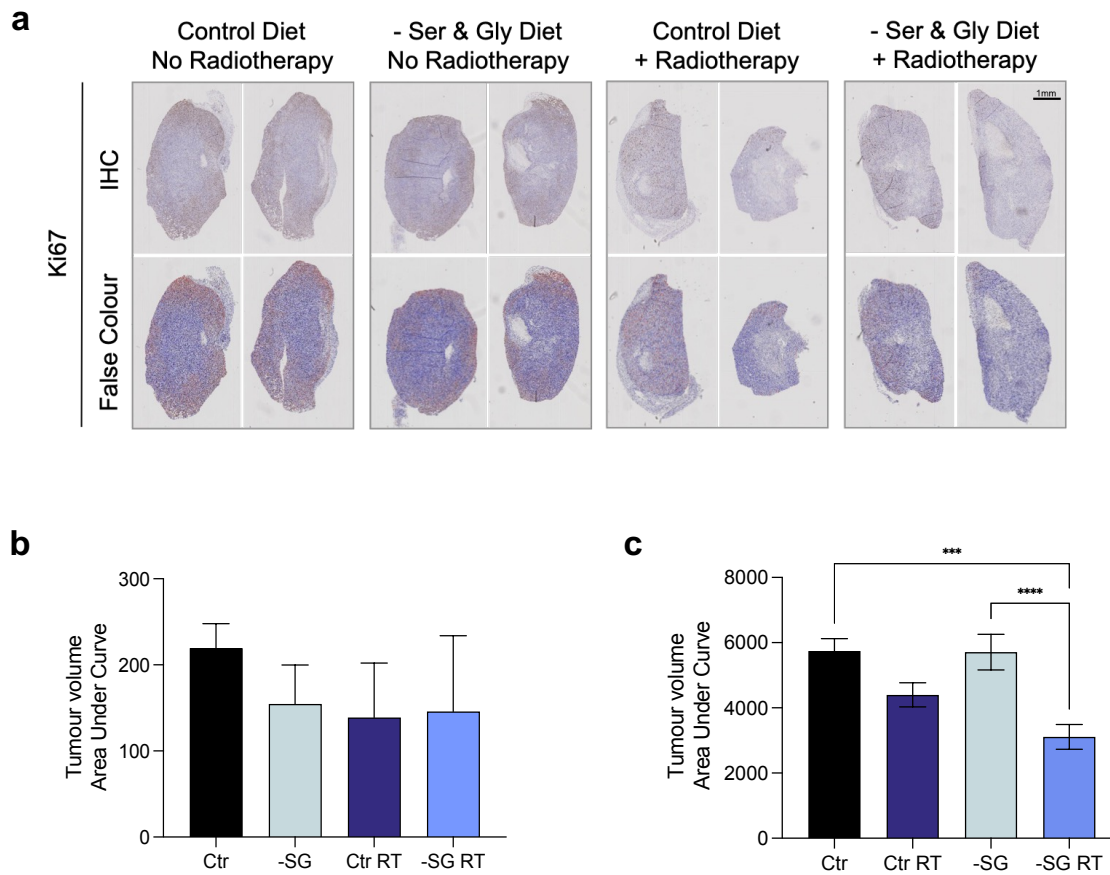

**Figure S7. Tumour growth area under curve (linked to figure 5)**

- a) Representative formalin fixed paraffin embedded tissue sections from KPC cell syngeneic subcutaneous isografts were stained for Ki67. Once measurable tumours had formed, mice were transferred to a diet regime consisting of either a control diet containing serine and glycine (Control diet) or a matched diet lacking serine and glycine (-SG diet); after three days on diet, tumours were treated with 20 Gy targeted X-ray radiation. None of the tumours reached size endpoint due to skin ulceration occurring in all experimental groups, so all tumours were harvested for IHC analysis within 7 days of radiation.
- b) Quantification of KPC cell syngeneic subcutaneous isografts shown in Fig. 5a as Area under the curve (AUC) for tumour volume (mean +/-SD, Control diet No RT  $n = 2$  mice, Control diet +RT  $n = 4$  mice, -SG diet No RT  $n = 6$  mice, -SG diet +RT  $n = 6$  mice).
- c) Quantification of Fig. 5c. 4T1 cell orthotopic isografts as Area under the curve (AUC) for tumour volume (mean +/-SD, Control diet No RT  $n = 13$  mice, Control diet +RT  $n = 12$  mice, -SG diet No RT  $n = 15$  mice, -SG diet +RT  $n = 12$  mice, Two-way ANOVA with Tukey's multiple comparisons test, \* $p < 0.05$ , \*\* $p < 0.005$ , \*\*\* $p < 0.0005$ , \*\*\*\* $p < 0.00005$ ).

|                            | Ctrl vs 5Gy | Ctrl vs 10Gy | Ctrl vs -SG | Ctrl vs 5Gy -SG | Ctrl vs 10Gy -SG | 5Gy vs 10Gy | 5Gy vs -SG | 5Gy vs 5Gy -SG | 5Gy vs 10Gy -SG | 10Gy vs -SG | 10Gy vs 5Gy -SG | 10Gy vs 10Gy -SG | 5Gy -SG vs 10Gy -SG | -SG vs 5Gy -SG | -SG vs 10Gy -SG |
|----------------------------|-------------|--------------|-------------|-----------------|------------------|-------------|------------|----------------|-----------------|-------------|-----------------|------------------|---------------------|----------------|-----------------|
| D-Glucose                  | 0.4603      | 0.9802       | 0.0264      | 0.1608          | 0.0223           | 0.8346      | 0.4654     | 0.9685         | 0.4139          | 0.0833      | 0.4191          | 0.0707           | 0.8299              | 0.8729         | >0.9999         |
| Fructose 1,6-bisphosphate  | 0.2032      | 0.6333       | 0.0017      | 0.7586          | 0.2835           | 0.9341      | <0.0001    | 0.0228         | 0.0050          | 0.0002      | 0.1054          | 0.0231           | 0.9360              | 0.0152         | 0.0707          |
| Glyceraldehyde 3-phosphate | 0.0074      | 0.3066       | 0.0082      | <0.0001         | 0.0001           | 0.2654      | <0.0001    | <0.0001        | <0.0001         | 0.0003      | <0.0001         | <0.0001          | 0.7110              | 0.0116         | 0.1256          |
| 1,3-bisphosphoglycerate    | 0.9957      | 0.0027       | 0.0021      | 0.0002          | 0.0004           | 0.0012      | 0.0010     | <0.0001        | 0.0002          | >0.9999     | 0.5154          | 0.7905           | 0.9955              | 0.6019         | 0.8613          |
| 3-phosphoglycerate         | 0.9957      | 0.0997       | 0.1862      | 0.0099          | 0.2070           | 0.2130      | 0.3695     | 0.0225         | 0.4038          | 0.9983      | 0.7378          | 0.9964           | 0.4735              | 0.5121         | >0.9999         |
| PEP                        | >0.9999     | 0.0393       | 0.0047      | 0.0013          | 0.0199           | 0.0392      | 0.0047     | 0.0013         | 0.0198          | 0.7941      | 0.3621          | 0.9982           | 0.5760              | 0.9625         | 0.9474          |
| Pyruvate                   | 0.9118      | 0.0499       | 0.9855      | 0.0315          | 0.0032           | 0.2411      | 0.9991     | 0.1600         | 0.0167          | 0.1415      | 0.9997          | 0.5887           | 0.7437              | 0.0912         | 0.0092          |
| Acetyl-CoA                 | 0.8776      | >0.9999      | <0.0001     | <0.0001         | <0.0001          | 0.9090      | <0.0001    | <0.0001        | <0.0001         | <0.0001     | <0.0001         | <0.0001          | >0.9999             | 0.0034         | 0.0045          |
| Citrate/Isocitrate         | 0.7060      | 0.0027       | 0.4233      | 0.8940          | 0.9628           | 0.0294      | 0.0481     | 0.9984         | 0.9853          | 0.0001      | 0.0151          | 0.0100           | 0.9998              | 0.0923         | 0.1372          |
| cis-Aconitate              | 0.2264      | 0.0005       | 0.5821      | 0.9915          | >0.9999          | 0.0216      | 0.0152     | 0.4761         | 0.2107          | <0.0001     | 0.0011          | 0.0004           | 0.9877              | 0.2961         | 0.6104          |
| 2-Oxoglutarate             | 0.5011      | 0.0345       | 0.2279      | 0.9778          | 0.9363           | 0.5105      | 0.0120     | 0.1978         | 0.1442          | 0.0007      | 0.0105          | 0.0075           | >0.9999             | 0.5549         | 0.6733          |
| Succinate                  | 0.9955      | >0.9999      | 0.6000      | 0.9997          | 0.6695           | 0.9787      | 0.8596     | >0.9999        | 0.9061          | 0.4846      | 0.9956          | 0.5522           | 0.8215              | 0.7607         | >0.9999         |
| Fumarate                   | 0.6708      | 0.0005       | 0.5466      | 0.9895          | 0.9803           | 0.0047      | 0.0634     | 0.9378         | 0.9591          | <0.0001     | 0.0011          | 0.0013           | >0.9999             | 0.2612         | 0.2293          |
| Malate                     | 0.6828      | 0.0009       | 0.4274      | 0.9896          | 0.9582           | 0.0093      | 0.0455     | 0.9427         | 0.9833          | <0.0001     | 0.0022          | 0.0031           | 0.9999              | 0.1901         | 0.1339          |
| Oxaloacetate               | 0.9982      | 0.5834       | 0.1714      | 0.3098          | 0.8540           | 0.3671      | 0.0900     | 0.1720         | 0.6418          | 0.9267      | 0.9934          | 0.9948           | 0.8938              | 0.9981         | 0.6973          |
| dATP                       | 0.0724      | <0.0001      | 0.1864      | 0.0269          | 0.0306           | <0.0001     | 0.0011     | 0.9897         | 0.9945          | <0.0001     | 0.0001          | <0.0001          | >0.9999             | 0.0005         | 0.0005          |
| dGTP                       | 0.0028      | 0.0023       | 0.1810      | 0.1069          | 0.8815           | >0.9999     | <0.0001    | 0.3048         | 0.0005          | <0.0001     | 0.2561          | 0.0004           | 0.0177              | 0.0016         | 0.6796          |
| dCTP                       | 0.9569      | 0.0002       | 0.9997      | 0.0006          | 0.0009           | 0.0007      | 0.9931     | 0.0021         | 0.0033          | 0.0003      | 0.9836          | 0.9258           | 0.9996              | 0.0009         | 0.0014          |
| dTTP                       | 0.2222      | <0.0001      | 0.8165      | <0.0001         | <0.0001          | <0.0001     | 0.8300     | 0.0002         | 0.0001          | <0.0001     | 0.3835          | 0.5215           | 0.9998              | <0.0001        | <0.0001         |
| Serine                     | 0.8875      | <0.0001      | <0.0001     | <0.0001         | <0.0001          | 0.0004      | <0.0001    | <0.0001        | <0.0001         | <0.0001     | <0.0001         | <0.0001          | >0.9999             | >0.9999        | >0.9999         |
| Glycine                    | <0.0001     | 0.0078       | <0.0001     | <0.0001         | <0.0001          | <0.0001     | <0.0001    | <0.0001        | <0.0001         | <0.0001     | <0.0001         | <0.0001          | 0.9798              | 0.9915         | 0.8021          |

**Table S1.** P-values from two-way ANOVA with Tukey's multiple comparison tests ( $p < 0.05$  are shaded grey) for the LCMS data shown in Figure 3.
